# Supplementary material for: Urinary Zinc Loss Identifies Prostate Cancer Patients
Source: MDPI journal article supplement (doi:10.3390/cancers14215316), 2022-10-28
Supplement: s1 [file s1]

# Urinary Zinc Loss Identifies Prostate Cancer Patients

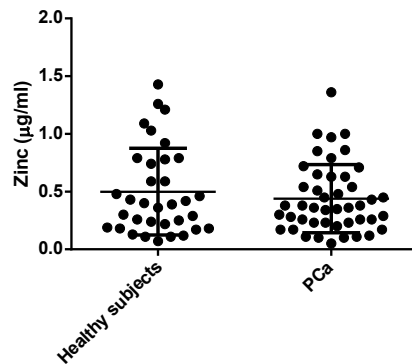

**Figure S1.** Urinary Zinc in healthy individuals and patients with PCa, in absence of prostate massage: Zinc in men with no evidence of PCa (Healthy subjects,  $n = 34$ ) or with diagnosis of PCa ( $n = 45$ ).
